# Supplementary material for: Environmental Variables Shaping the Ecological Niche of Thaumarchaeota in Soil: Direct and Indirect Causal Effects
Source: PubMed Central journal article supplement (PMC4524719; doi:10.1371/journal.pone.0133763), 2015-08-04
Supplement: pone.0133763.s001.pdf [file pone.0133763.s001.pdf]

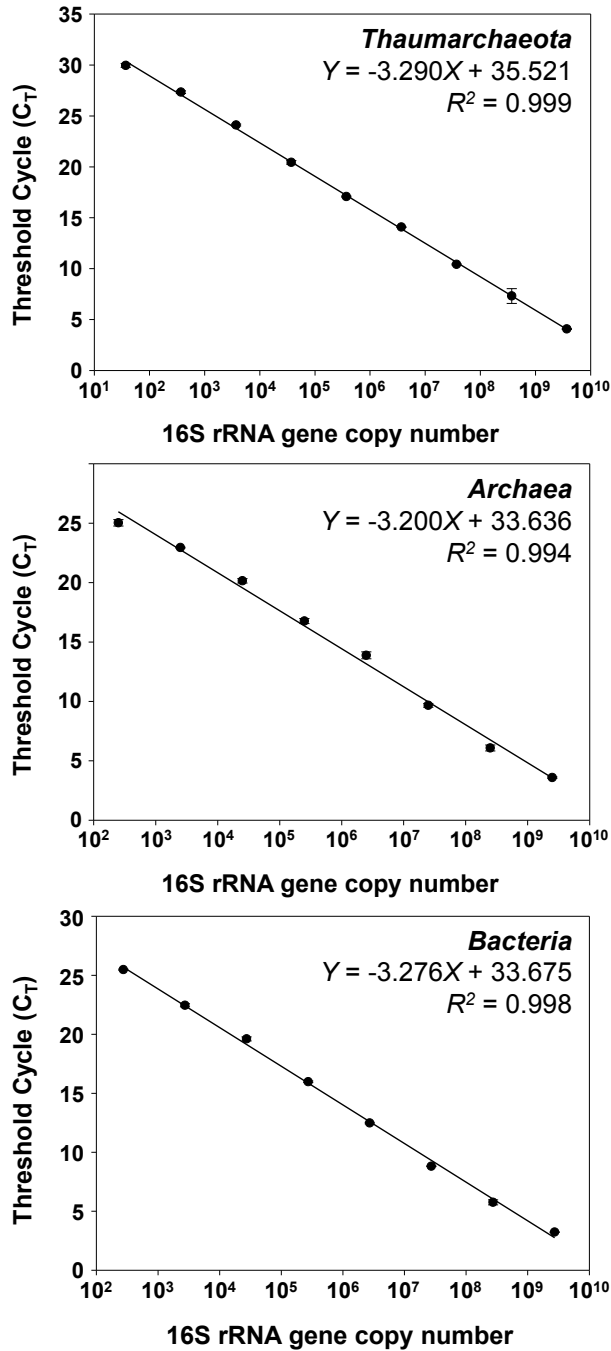

**S1 Fig.** Standard curves of C<sub>T</sub> values versus (A) thaumarchaeotal, (B) archaeal, and (C) bacterial 16S rRNA gene copy numbers. Solid lines indicate regression curves and error bars indicate standard deviations obtained in quadruplicate experiments. The R<sup>2</sup> values of regression curves were 0.999 for *Thaumarchaeota*, 0.994 for *Archaea*, and 0.998 for *Bacteria*, respectively.
