# Supplementary material for: Environmental Variables Shaping the Ecological Niche of Thaumarchaeota in Soil: Direct and Indirect Causal Effects
Source: PubMed Central journal article supplement (PMC4524719; doi:10.1371/journal.pone.0133763), 2015-08-04
Supplement: pone.0133763.s003.pdf [file pone.0133763.s003.pdf]

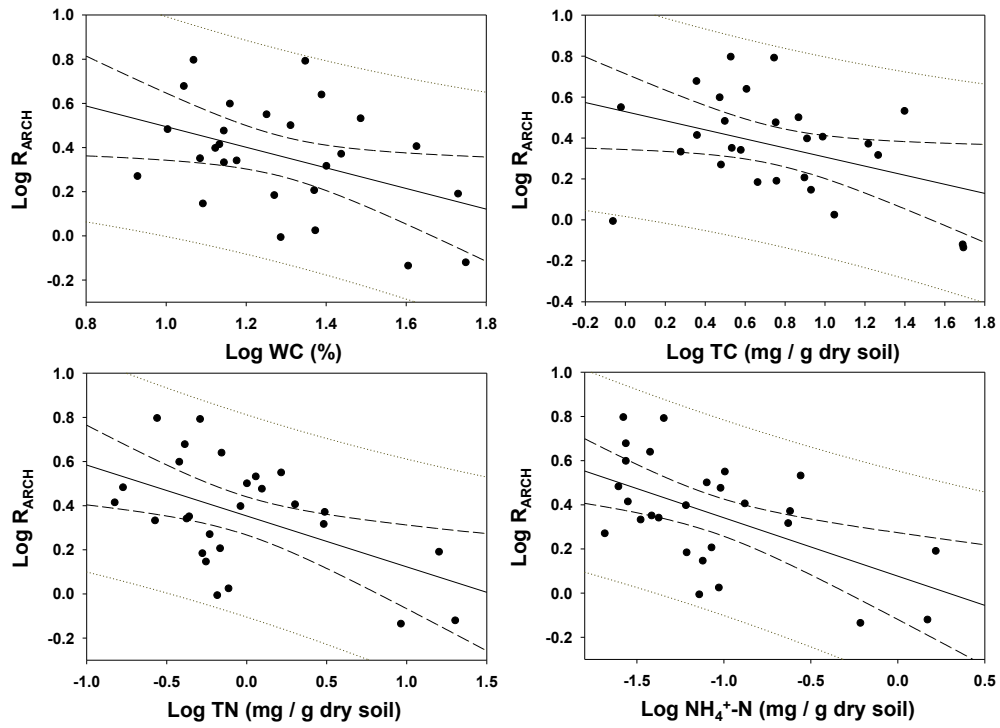

**S3 Fig.** Significant ( $p < 0.05$ , ANOVA) regression curves indicating the effects of WC, TC, TN, and  $\text{NH}_4^+\text{-N}$  upon  $R_{\text{ARCH}}$ .
