# Supplementary material for: Environmental Variables Shaping the Ecological Niche of Thaumarchaeota in Soil: Direct and Indirect Causal Effects
Source: PubMed Central journal article supplement (PMC4524719; doi:10.1371/journal.pone.0133763), 2015-08-04
Supplement: pone.0133763.s005.pdf [file pone.0133763.s005.pdf]

**S1 Table.** *In silico* evaluation (percent matched 16S rRNA gene sequences)<sup>a</sup> of primer pairs, used to quantify the abundance of *Thaumarchaeota*.

| Taxa                               | No. of sequences used for evaluation | PCR primer pair used in this study (THAUM-494-ARC917R) <sup>b</sup> |                        |                      | Previously used PCR primer pairs for quantifying <i>Thaumarchaeota</i> |                   |                   |                               |                                |                                 |
|------------------------------------|--------------------------------------|---------------------------------------------------------------------|------------------------|----------------------|------------------------------------------------------------------------|-------------------|-------------------|-------------------------------|--------------------------------|---------------------------------|
|                                    |                                      |                                                                     |                        |                      | Primer pair 771F-957R                                                  |                   |                   | Primer pair MCGI391f-MCGI554r |                                |                                 |
|                                    |                                      | Primer pair                                                         | THAUM-494 <sup>c</sup> | ARC917R <sup>d</sup> | Primer pair                                                            | 771F <sup>e</sup> | 957R <sup>e</sup> | Primer pair                   | MCGI391f <sup>f</sup> (MGI391) | MCGI554r <sup>f</sup> (Cren537) |
| <i>Crenarchaeota</i>               | 872                                  | 0.9                                                                 | 0.9                    | 76.3                 | 1.0                                                                    | 10.9              | 0.6               |                               |                                |                                 |
| <i>Euryarchaeota</i>               | 6,072                                |                                                                     |                        | 91.8                 | ≈0                                                                     |                   | ≈0                |                               |                                |                                 |
| <i>Korarchaeota</i>                | 88                                   |                                                                     |                        |                      |                                                                        |                   |                   |                               |                                |                                 |
| <i>Nanoarchaeota</i>               | 3                                    |                                                                     |                        |                      |                                                                        |                   |                   |                               |                                |                                 |
| <i>Thaumarchaeota</i> <sup>g</sup> | 1,549                                | <b>89.3</b>                                                         | 92.9 <sup>a</sup>      | 96.1                 | 21.9                                                                   | 94.6              | 22.4              | 33.7                          | 35.8                           | 65.5                            |
| FSCG                               | 17                                   |                                                                     |                        | 100                  |                                                                        | 76.5              |                   |                               |                                |                                 |
| HWCG-III                           | 25                                   | 32.0                                                                | 36.0                   | 92.0                 | 76.0                                                                   | 100               |                   |                               |                                |                                 |
| MG-I                               | 1,100                                | <b>92.9</b>                                                         | 96.6                   | 96.0                 | 0.2                                                                    | 95.2              | 0.1               | 47.5                          | 50.4                           | 92.3                            |
| RC                                 | 7                                    |                                                                     |                        | 100                  | 57.1                                                                   | 85.7              |                   |                               |                                |                                 |
| SAGMCG-I                           | 40                                   | <b>97.5</b>                                                         | 100                    | 97.5                 |                                                                        | 7.5               | 87.5              |                               |                                |                                 |
| SCG                                | 355                                  | <b>87.6</b>                                                         | 90.7                   | 96.3                 | 87.3                                                                   | 94.1              | 96.1              |                               |                                |                                 |
| UT-I                               | 2                                    | 50.0                                                                | 100                    | 50.0                 | 100.0                                                                  | 100               | 50.0              |                               |                                |                                 |
| UT-II                              | 1                                    | <b>100.0</b>                                                        | 100                    | 100                  |                                                                        | 100               |                   |                               |                                |                                 |
| UT-III                             | 2                                    | <b>100.0</b>                                                        | 100                    | 100                  |                                                                        | 100               |                   |                               |                                |                                 |
| DSAG <sup>h</sup>                  | 326                                  |                                                                     |                        | 93.3                 |                                                                        |                   |                   |                               |                                |                                 |
| THSCG <sup>h</sup>                 | 50                                   |                                                                     |                        | 68.0                 |                                                                        |                   |                   |                               |                                |                                 |
| MCG <sup>h</sup>                   | 483                                  |                                                                     |                        | 93.2                 |                                                                        | 28.0              | 0.2               |                               |                                |                                 |
| UG <sup>h</sup>                    | 12                                   |                                                                     |                        | 91.7                 |                                                                        |                   |                   |                               |                                |                                 |
| Unclassified <i>Archaea</i>        | 272                                  |                                                                     |                        | 78.3                 | 36.4                                                                   | 41.2              | 0.4               |                               |                                |                                 |
| Domain <i>Bacteria</i>             | 667,899                              |                                                                     |                        |                      |                                                                        |                   |                   |                               |                                |                                 |

<sup>a</sup> Estimated by Hong *et al.* (Hong *et al.*, 2014)

<sup>b</sup> Forward primer, THAUM-494; reverse primer, ARC917R

<sup>c</sup> *Thaumarchaeota*-directed primer (3'-GAATAAGGGGTGGGCAAGT-5', Hong *et al.*, 2014)

<sup>d</sup> Archaeal universal primer (3'-GAATTGGCGGGGAGCAC-5', Loy *et al.*, 2002)

<sup>e</sup> Developed by Ochsenreiter *et al.* (Ochsenreiter *et al.*, 2003)

<sup>f</sup> Developed by Auguet *et al.* (Auguet *et al.*, 2012)

<sup>g</sup> Thaumarchaeotal subgroup sequences classified by Hong *et al.* (Hong *et al.*, 2014). FSCG, Forest Soil Crenarchaeotic Group; HWCG-III, Hot Water Crenarchaeotic Group III; MG-I, Marine Group I; RC, Rice Cluster; SAGMCG-I, South African Gold Mine Crenarchaeotic Group I; SCG, Soil Crenarchaeotic Group; UT-I, -II, and -III, Unclassified Thaumarchaeota-I, -II, and -III.

<sup>h</sup> Environmental archaeal groups classified by Hong *et al.* (Hong *et al.* 2014). DSAG, Deep Sea Archaeal Group; THSCG, Terrestrial Hot Spring Crenarchaeotic Group; MCG, Miscellaneous Crenarchaeotic Group; UG, Unclassified Group.
