# Supplementary material for: Environmental Variables Shaping the Ecological Niche of Thaumarchaeota in Soil: Direct and Indirect Causal Effects
Source: PubMed Central journal article supplement (PMC4524719; doi:10.1371/journal.pone.0133763), 2015-08-04
Supplement: pone.0133763.s006.pdf [file pone.0133763.s006.pdf]

**S2 Table.** *In silico* evaluation (percent matched 16S rRNA gene sequences)<sup>c</sup> of universal primers, used to quantify the abundance of *Archaea* and *Bacteria*.

| Taxa                               | No. of sequences used for evaluation | Archaeal universal primers pair <sup>a</sup> | Bacterial universal primers pair <sup>b</sup> |
|------------------------------------|--------------------------------------|----------------------------------------------|-----------------------------------------------|
|                                    |                                      | ARC806-ARC915                                | Eub338-BAC515                                 |
| <i>Archaea</i>                     | 25,760                               | 86.6 <sup>c</sup>                            | 0.0                                           |
| <i>Crenarchaeota</i>               | 2,202                                | 72.8                                         | 0.0                                           |
| <i>Euryarchaeota</i>               | 14,339                               | 87.6                                         | 0.0                                           |
| <i>Korarchaeota</i>                | 92                                   | 0.0                                          | 0.0                                           |
| <i>Nanoarchaeota</i>               | 139                                  | 0.0                                          | 0.0                                           |
| <i>Thaumarchaeota</i>              | 7,761                                | 95.7                                         | 0.0                                           |
| Unclassified <i>Archaea</i>        | 1,200                                | 58.2                                         | 0.0                                           |
| <i>Bacteria</i>                    | 1,408,156                            | 0.0                                          | 76.3                                          |
| <i>Actinobacteria</i>              | 212,832                              | 0.0                                          | 62.9                                          |
| <i>Aquificae</i>                   | 968                                  | 0.0                                          | 4.6                                           |
| <i>Bacteroidetes</i>               | 173,039                              | 0.0                                          | 84.9                                          |
| <i>Caldisei</i>                    | 218                                  | 0.0                                          | 0.5                                           |
| <i>Chlamydiae</i>                  | 317                                  | 0.0                                          | 0.0                                           |
| <i>Chlorobi</i>                    | 381                                  | 0.0                                          | 0.0                                           |
| <i>Chloroflexi</i>                 | 21,334                               | 0.0                                          | 12.2                                          |
| <i>Chrysiogenetes</i>              | 14                                   | 0.0                                          | 71.4                                          |
| <i>Deferribacteres</i>             | 398                                  | 0.0                                          | 95.5                                          |
| <i>Deinococcus-Thermus</i>         | 2,059                                | 0.0                                          | 93.1                                          |
| <i>Dictyoglomi</i>                 | 19                                   | 0.0                                          | 0.0                                           |
| <i>Elusimicrobia</i>               | 356                                  | 0.0                                          | 58.7                                          |
| <i>Fibrobacteres</i>               | 823                                  | 0.0                                          | 89.2                                          |
| <i>Fusobacteria</i>                | 1,181                                | 0.0                                          | 924.6                                         |
| <i>Gemmatimonadetes</i>            | 1,335                                | 0.0                                          | 59.3                                          |
| <i>Lentisphaerae</i>               | 1,792                                | 0.0                                          | 0.2                                           |
| <i>Nitrospirae</i>                 | 1,647                                | 0.0                                          | 58.5                                          |
| <i>Planctomycetes</i>              | 11,190                               | 0.0                                          | 0.9                                           |
| <i>Proteobacteria</i>              | 398,053                              | 0.0                                          | 80.6                                          |
| <i>Spirochaetes</i>                | 10,229                               | 0.0                                          | 17.1                                          |
| <i>Synergistetes</i>               | 1,231                                | 0.0                                          | 79.9                                          |
| <i>Tenericutes</i>                 | 4,632                                | 0.0                                          | 3.1                                           |
| <i>Thermodesulfobacteria</i>       | 106                                  | 0.0                                          | 88.7                                          |
| <i>Thermotogae</i>                 | 648                                  | 0.0                                          | 53.5                                          |
| BRC1                               | 395                                  | 0.0                                          | 13.7                                          |
| <i>Parcubacteria</i>               | 150                                  | 0.0                                          | 0.0                                           |
| <i>Microgenomates</i>              | 111                                  | 0.0                                          | 0.0                                           |
| SR1                                | 319                                  | 0.0                                          | 78.4                                          |
| <i>Candidatus Saccharibacteria</i> | 2,350                                | 0.0                                          | 0.1                                           |
| <i>Latescibacteria</i>             | 550                                  | 0.0                                          | 72.4                                          |
| <i>Armatimonadetes</i>             | 1,112                                | 0.0                                          | 2.6                                           |
| <i>Verrucomicrobia</i>             | 10,137                               | 0.0                                          | 0.1                                           |
| <i>Acidobacteria</i>               | 15,398                               | 0.0                                          | 66.9                                          |
| <i>Firmicutes</i>                  | 459,584                              | 0.0                                          | 88.9                                          |
| <i>Cyanobacteria / Chloroplast</i> | 24,493                               | 0.0                                          | 66.4                                          |
| <i>Marinimicrobia</i>              | 982                                  | 0.0                                          | 71.2                                          |
| <i>Aminicenantes</i>               | 1,464                                | 0.0                                          | 87.2                                          |
| <i>Omnitrophica</i>                | 19                                   | 0.0                                          | 10.5                                          |
| <i>Acetothermia</i>                | 39                                   | 0.0                                          | 0.0                                           |
| <i>Poribacteria</i>                | 103                                  | 0.0                                          | 3.9                                           |
| <i>Atribacteria</i>                | 65                                   | 0.0                                          | 96.9                                          |
| <i>Cloacimonetes</i>               | 167                                  | 0.0                                          | 9.6                                           |
| <i>Candidatus Calescamantes</i>    | 3                                    | 0.0                                          | 66.7                                          |
| WPS-1                              | 769                                  | 0.0                                          | 0.0                                           |
| WPS-2                              | 97                                   | 0.0                                          | 0.0                                           |
| <i>Hydrogenedentes</i>             | 446                                  | 0.0                                          | 2.0                                           |
| ZB3                                | 75                                   | 0.0                                          | 49.3                                          |
| <i>Ignavibacteriae</i>             | 739                                  | 0.0                                          | 91.7                                          |
| <i>Nitrospinae</i>                 | 525                                  | 0.0                                          | 95.2                                          |
| Unclassified <i>Bacteria</i>       | 32,285                               | 0.0                                          | 36.2                                          |

<sup>a</sup> Archaeal universal primer pair: Forward primer, ARC806 (3'-GGACTACVSGGGTATCTAAT-5', Casamayor *et al.*, 2002); reverse primer, ARC915 (3'-GTGCTCCCCGCCAATTCCT-5', Takai and Horikoshi, 2000)

<sup>b</sup> Bacterial universal primer pair: Forward primer, Eub338 (3'-CTGCTGCCTCCCGTAGGAGT-5', Nadkarni *et al.*, 2002); reverse primer, BAC515 (3'-GTGCCAGCAGCCGCGTAATACG-5', Stahl and Amann, 1991)

<sup>c</sup> Estimation using RDP's ProbeMatch software.
